# Supplementary material for: Multicopy Single-Stranded DNA Directs Intestinal Colonization of Enteric Pathogens
Source: PLoS Genet. 2015 Sep 14;11(9):e1005472. doi: 10.1371/journal.pgen.1005472 (PMC4569332; doi:10.1371/journal.pgen.1005472)
Supplement: S2 Table — (XLSX) [file pgen.1005472.s006.xlsx]

## Sheet: strains and plasmids
Strain	Genotype	Reference or Source
HA420	ATCC 14028s (spontaneous NalR)	Bogomolnaya 2008
HA1444	HA420 ∆STM3846 (KanR, NalR)	Elfenbein 2013
HA1446	HA1444 carrying pSTM3846 (NalR, KanR, AmpR)	Elfenbein 2013
JE122	HA1444 carrying pWSK29 (NalR, KanR, AmpR)	This Study
HA964	14028 ∆SPI-1::cm (CmR)	This study
HA697	14028 ∆phoN::str (StrR)	Elfenbein 2013
JE23	HA420 ∆STM3846::kan, ∆phoN::str (NalR, KanR, StrR)	This Study
JE25	HA964 ∆STM3846::kan, ∆phoN::str (CmR, KanR, StrR)	This Study
JE42	HA964 ∆phoN::str (StrR)	This Study
JE67	HA420 ∆phoN::str (NalR, StrR)	Bogomolnaya 2013
JE63	JE23 carrying pWSK29 (NalR, KanR, StrR, AmpR)	This Study
JE65	JE23 carrying pSTM3846 (NalR, KanR, StrR, AmpR)	This Study
JE106	14028 ∆msd::kan (KanR)	This Study
JE128	HA420 ∆msd::Kan (NalR, KanR)	This Study
JE135	HA420 ∆msd::FRT (NalR)	This Study
JE142	HA420 ∆STM3846::FRT (NalR)	This Study
JE143	HA420 ∆STM3845::FRT (NalR)	This Study
JE144	HA420 ∆msd::FRT carrying pWSK29 (NalR, AmpR)	This Study
JE145	HA420 ∆msd::FRT carrying pRetronpro (NalR, AmpR)	This Study
JE146	HA420 ∆msd::FRT phoN::str (NalR, StrR)	This Study
JE154	JE146 carrying pRetronpro (NalR, StrR, AmpR)	This Study
JE156	JE146 carrying pWSK29 (NalR, StrR, AmpR)	This Study
JE301	Escherichia coli O127:H6 strain E2348/69 (spontaneous NalR)	M. Donnenberg
JE304	JE301 ∆E2348_3890::kan (NalR, KanR)	This Study
JE308	14028 ∆STM4343::kan (KanR)	This Study
JE309	HA420 ∆STM4343::kan (NalR, KanR)	This Study
JE334	JE142 ∆STM4343::kan (NalR, KanR)	This Study
JE315	14028 ∆STM0964::cm (Cm-R)	Porwollik 2014
JE319	14028 ∆STM2530::kan (Kan-R)	This Study
	14028 ∆STM4305::kan (KanR)	Santiviago 2009
JE313	HA420 ∆STM4305::kan (NalR, KanR)	This Study
JE333	HA420 ∆STM4305::kan ∆STM0964::cm (Kan, Cm-R)	This Study
JE341	HA420 ∆STM4305::frt ∆STM0964::frt ∆STM2530::frt (Nal-R)	This Study
JE343	HA420 ∆STM4305::frt ∆STM0964::frt ∆STM2530::frt ∆STM3846::kan (Nal, Kan-R)	This Study
CAL50	14028 ∆napA ∆narZ narG::pGP20 (Nal-R)	Lopez 2013
JE335	CAL50 ∆STM3846::kan (Nal, Kan-R)	This Study
JE472	JE304 carrying pWSK29	This Study
JE470	JE304 carrying pEPECRT	This Study
Plasmid	Description	Reference
pWSK29	cloning vector; AmpR	Wang 1991
pSTM3846	pWSK29::STM3846; AmpR	Elfenbein 2013
pRetronpro	pWSK29::msrmsd; AmpR	This study
pEPECRT	pWSK29::E2348_3890; Amp-R	This Study
pCP20	flp recombinase; AmpR	Datsenko 2000
pCLF3.1	template for Cm-R KO PCR product	Santiviago 2009
pCLF4.1	template for Kan-R KO PCR product	Santiviago 2009
pKD46	lambda-red recombinase; AmpR	Datsenko 2000
